# Supplementary material
Source: PubMed Central journal article supplement (PMC4811673)
Supplement: NIHMS758762-supplement-3.pdf [file NIHMS758762-supplement-3.pdf]

## **Increased IGFBP-1 phosphorylation in response to leucine deprivation is mediated by CK2 and PKC**

### **Supplementary Legends**

#### **Supplementary Figure 1. Schematic diagram outlining the methods used in this study**

#### **Supplementary Figure 2. Dose-dependent changes in IGFBP-1 phosphorylation with Bisindolylmaleimide (BIS).**

A significant decrease in IGFBP-1 phosphorylation was seen at 10  $\mu\text{M}$  BIS which remained consistent at twice the inhibitor concentration (20  $\mu\text{M}$ ). A mid concentration between 5 $\mu\text{M}$  and 10 $\mu\text{M}$  BIS (7.5  $\mu\text{M}$ ) was used in subsequent experiments. Values are displayed as mean + SEM. \* $p < 0.05$ , \*\* $p = 0.001-0.05$ , \*\*\* $p < 0.001$  versus control; One-way analysis of variance; Dunnet's Multiple Comparison Test;  $n=3$ .

#### **Supplementary Figure 3A. HepG2 cell vitality after treatment with BIS (7.5 $\mu\text{M}$ ) for 24 hours**

A graphical representation of cell vitality between leucine plus or minus treatments with or without BIS. A Trypan Blue exclusion assay was conducted to assess cell viability, illustrated as the ratio of live to total cells. Values are normalized to viability in control samples (leucine plus, no inhibitor). BIS inhibition did not compromise cell survival. Values are displayed as mean + SEM. \* $p < 0.05$ , \*\* $p = 0.001-0.05$ , \*\*\* $p < 0.0001$  versus control; One-way analysis of variance; Dunnet's Multiple Comparison Test;  $n=3$ . C:450 Control, 450  $\mu\text{M}$  leucine. C:0: Leucine deprivation, 0  $\mu\text{M}$  leucine. BIS:450: Bisindolylmaleimide (7.5  $\mu\text{M}$ ), 450  $\mu\text{M}$  leucine. BIS:0: Bisindolylmaleimide (7.5  $\mu\text{M}$ ), 0  $\mu\text{M}$  leucine.

1 **Supplementary Figure 3B. HepG2 cell vitality after treatment with TBB (1  $\mu$ M) for 24**  
2 **hours**

3 A graphical representation of cell vitality between leucine plus or minus treatments with or  
4 without TBB. A Trypan Blue exclusion assay was conducted to assess cell viability, illustrated as  
5 the ratio of live to total cells. Values are normalized to viability in control samples (leucine plus,  
6 no inhibitor). TBB did not compromise cell survival. Values are displayed as mean + SEM. \* $p$ <  
7 0.05, \*\* $p$ = 0.001-0.05, \*\*\* $p$  < 0.0001 versus control; One-way analysis of variance;  
8 Dunnet's Multiple Comparison Test;  $n$ =3. C:450 Control, 450  $\mu$ M leucine. C:0: Leucine  
9 deprivation, 0  $\mu$ M leucine. TBB:450: TBB (1  $\mu$ M), 450  $\mu$ M leucine. TBB:0: TBB (1  $\mu$ M), 0  $\mu$ M  
10 leucine.

11  
12 **Supplementary Figure 4. MRM spectra of non phosphorylated synthetic IGF1P-1 peptides**  
13 **used for CK2 *in vitro* kinase assay**

14 MRM/MS successfully detected synthetic peptides corresponding to the digested fragments of  
15 IGF1P-1 containing Ser101, Ser119 or Ser169 sites.

16  
17 **Supplementary Figure 5. Efficiency of CK2 $\alpha$ + $\alpha'$ + $\beta$  silencing**

18 A representative immunoblot of HepG2 cell lysates (50  $\mu$ g per lane) demonstrates knockdown  
19 efficiencies of each CK2 subunit. CK2 $\alpha$ , CK2 $\alpha'$  and CK2 $\beta$  expression were decreased (-45-55%)  
20 regardless of leucine status in HepG2 cells treated with siRNA against all three CK2 subunits.  
21 Values are displayed as mean + SEM. \* $p$ < 0.05, \*\* $p$ = 0.001-0.05, \*\*\* $p$  < 0.0001 versus control;  
22 One-way analysis of variance; Dunnet's Multiple Comparison Test;  $n$ =3. Sc: Scrambled, 450  $\mu$ M

1 leucine. Sc:0: Scrambled, 0  $\mu$ M leucine. CK2:450: CK2 $\alpha$ + $\alpha'$ + $\beta$  siRNA, 450  $\mu$ M leucine. CK2:0:  
2 CK2 $\alpha$ + $\alpha'$ + $\beta$  siRNA, 0  $\mu$ M leucine.

3

#### 4 **Supplementary Figure 6. Efficiency of pan-PKC silencing**

5 A representative immunoblot of HepG2 cell lysates (50  $\mu$ g per lane) assayed for PKC $\delta$  and  
6 PKC $\epsilon$  expression following siRNA silencing of pan-PKC. The expression of A. PKC $\delta$  and B.  
7 PKC $\epsilon$  were both reduced (-50%) regardless of leucine status by pan-PKC siRNA in HepG2 cells.  
8 Values are displayed as mean + SEM. \* $p$  < 0.05, \*\* $p$  = 0.001-0.05, \*\*\* $p$  < 0.0001 versus control;  
9 One-way analysis of variance; Dunnet's Multiple Comparison Test; n=3. Sc: Scrambled, 450  $\mu$ M  
10 leucine. Sc:0: Scrambled, 0  $\mu$ M leucine. PKC:450: pan-PKC siRNA, 450  $\mu$ M leucine. PKC:0:  
11 pan-PKC siRNA, 0  $\mu$ M leucine.

12

#### 13 **Supplementary Figure 7. Effects of conditioned HepG2 cell media immuno-depleted for** 14 **IGFBP-1 on IGF-1R autophosphorylation**

15 An IGF-1R autophosphorylation assay in P6 cells treated with conditioned HepG2 cell media  
16 depleted of IGFBP-1 verifies that the reduction of IGF-I bioactivity (IGF-1R $\beta$  (Tyr1135)) is due  
17 to IGFBP-1 and independent of other cell media components. Values are displayed as mean +  
18 SEM. \* $p$  < 0.05, \*\* $p$  = 0.001-0.05, \*\*\* $p$  < 0.001 versus control; One-way analysis of variance;  
19 Dunnet's Multiple Comparison Test; n=3. – IGF-I: Negative control, no IGF-I, no IGFBP-1.  
20 +IGF-I: Positive control, 25 ng/mL IGF-I, no IGFBP-1. Control: Intact HepG2 cell media.  
21 Control (Dep): IGFBP-1-depleted HepG2 cell media.

22

#### 23 **Supplementary Figure 8. Effects of TBB and BIS treatments on CK2 activity**

1 **A.** A CK2 activity assay demonstrates that treatment with TBB, but not BIS, reduces CK2  
2 activity. **B.** BIS, but not TBB, reduces PKC activity. TBB and BIS do not have off-target effects  
3 on PKC and CK2 activity, respectively, under control (leucine plus) conditions. Values are  
4 displayed as mean + SEM. \* $p < 0.05$ , \*\* $p = 0.001-0.05$ , \*\*\* $p < 0.0001$  versus control; One-way  
5 analysis of variance; Dunnet's Multiple Comparison Test;  $n=3$ . Control: 450  $\mu\text{M}$  leucine. BIS:  
6 Bisindolylmaleimide (7.5  $\mu\text{M}$ ), 450  $\mu\text{M}$  leucine. TBB: TBB (1  $\mu\text{M}$ ), 450  $\mu\text{M}$  leucine.

7
